# Supplementary material for: Mapping global dynamics of benchmark creation and saturation in artificial intelligence
Source: PubMed Central journal article supplement (PMC9649641; doi:10.1038/s41467-022-34591-0), 2022-11-10
Supplement: 41467_2022_34591_MOESM1_ESM.pdf [file 41467_2022_34591_MOESM1_ESM.pdf]

---

# Mapping global dynamics of benchmark creation and saturation in artificial intelligence

---

## Supplementary Information

**Supplementary Figure 1:** Global SOTA improvement map for computer vision. Anchors (vertical dashes) and only multiple dot trajectories shown in the plot.

**Supplementary Figure 2:** AI benchmark lifecycle map for computer vision.

**Supplementary Figure 3:** Number of active benchmarks vs. number of benchmarks reporting novel SOTA results over time for computer vision tasks.

High definition images of all figures are available here:

<https://drive.google.com/drive/folders/12aA8t49sp7hxqVZJdWCrh-gvVolxtYeh>

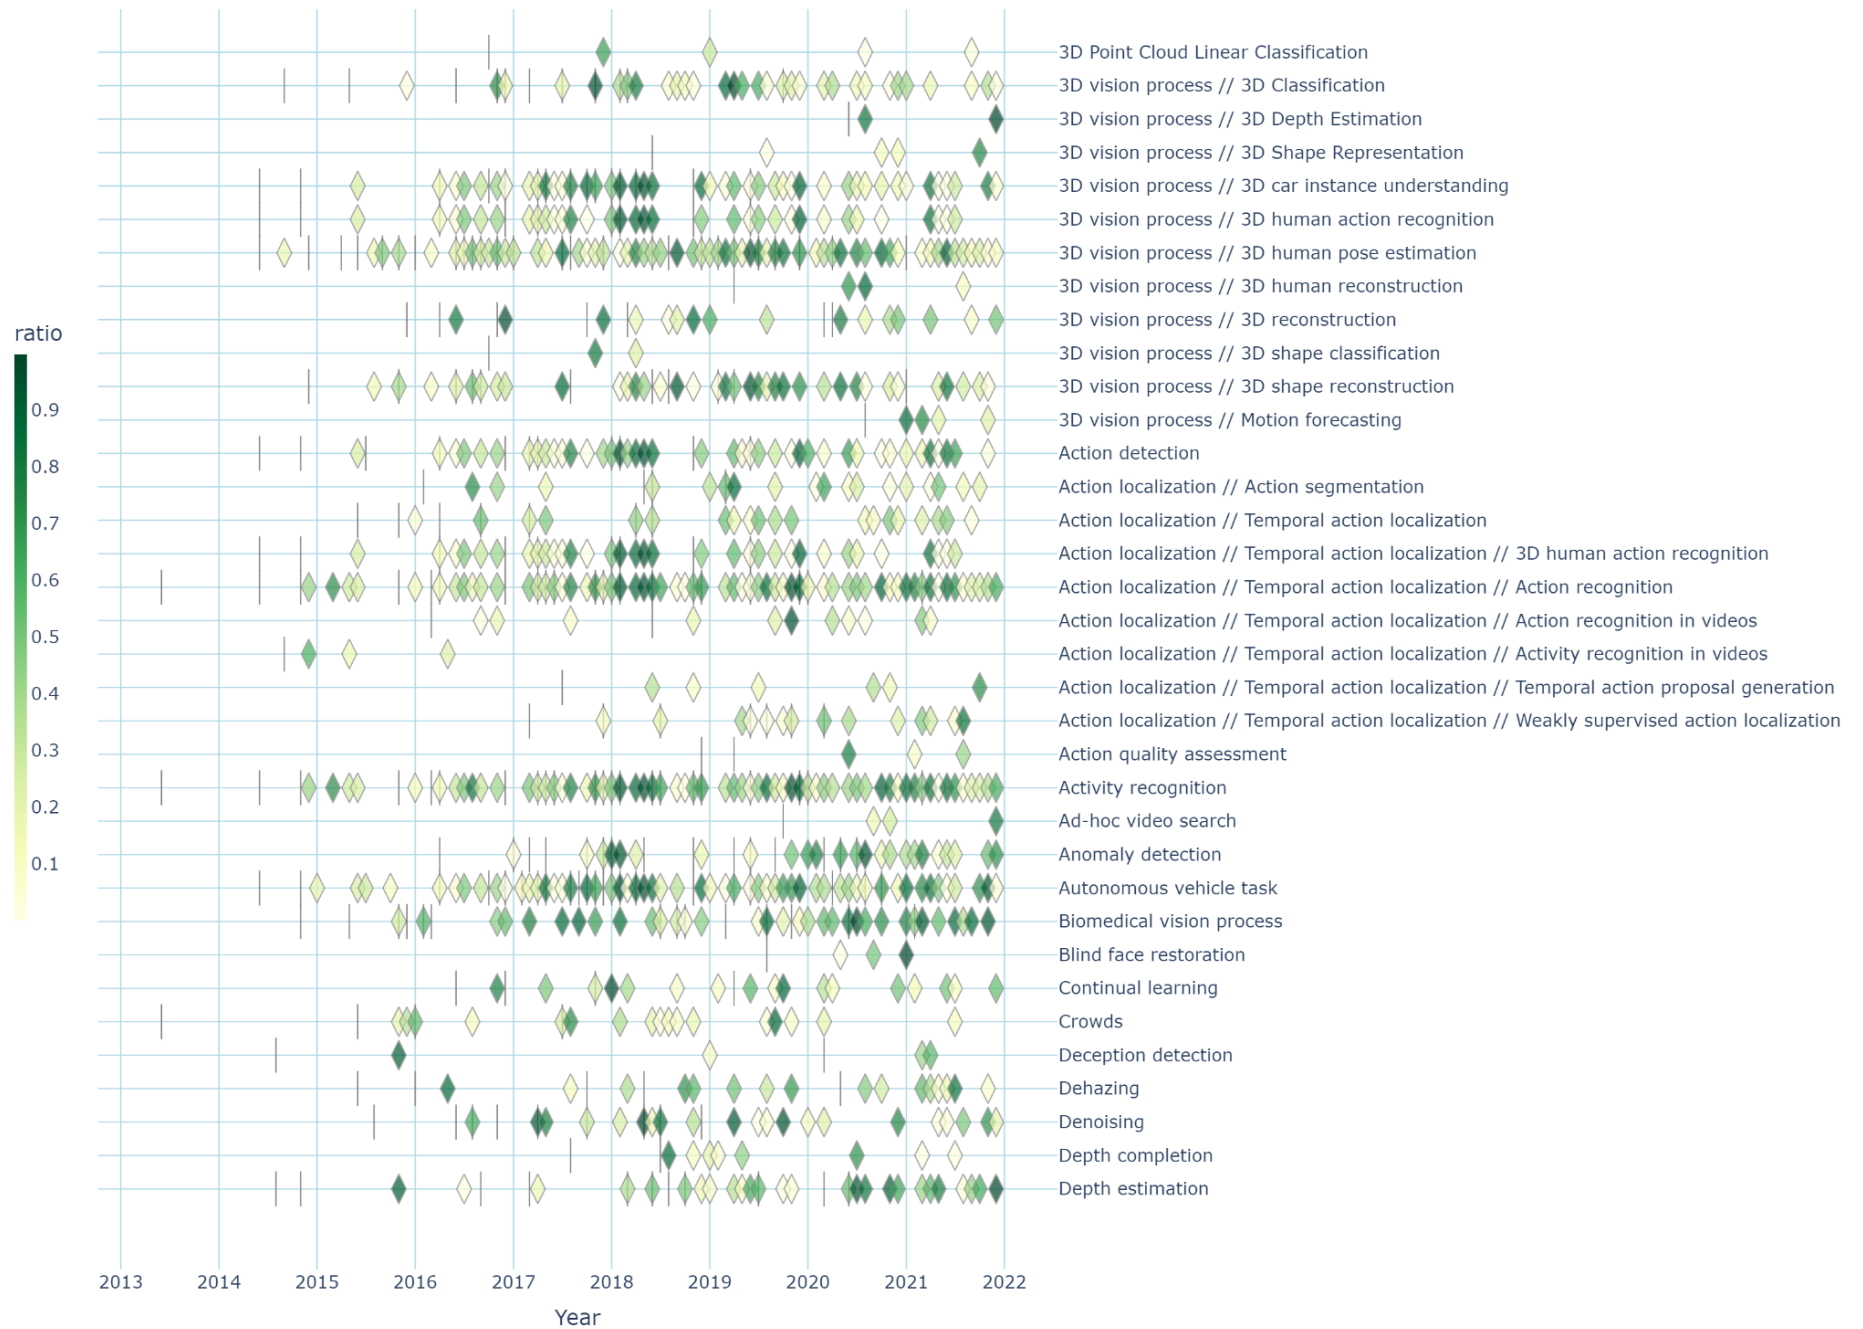

Supplementary Figure 1 (continued on following pages): **Global SOTA improvement map for computer vision.**

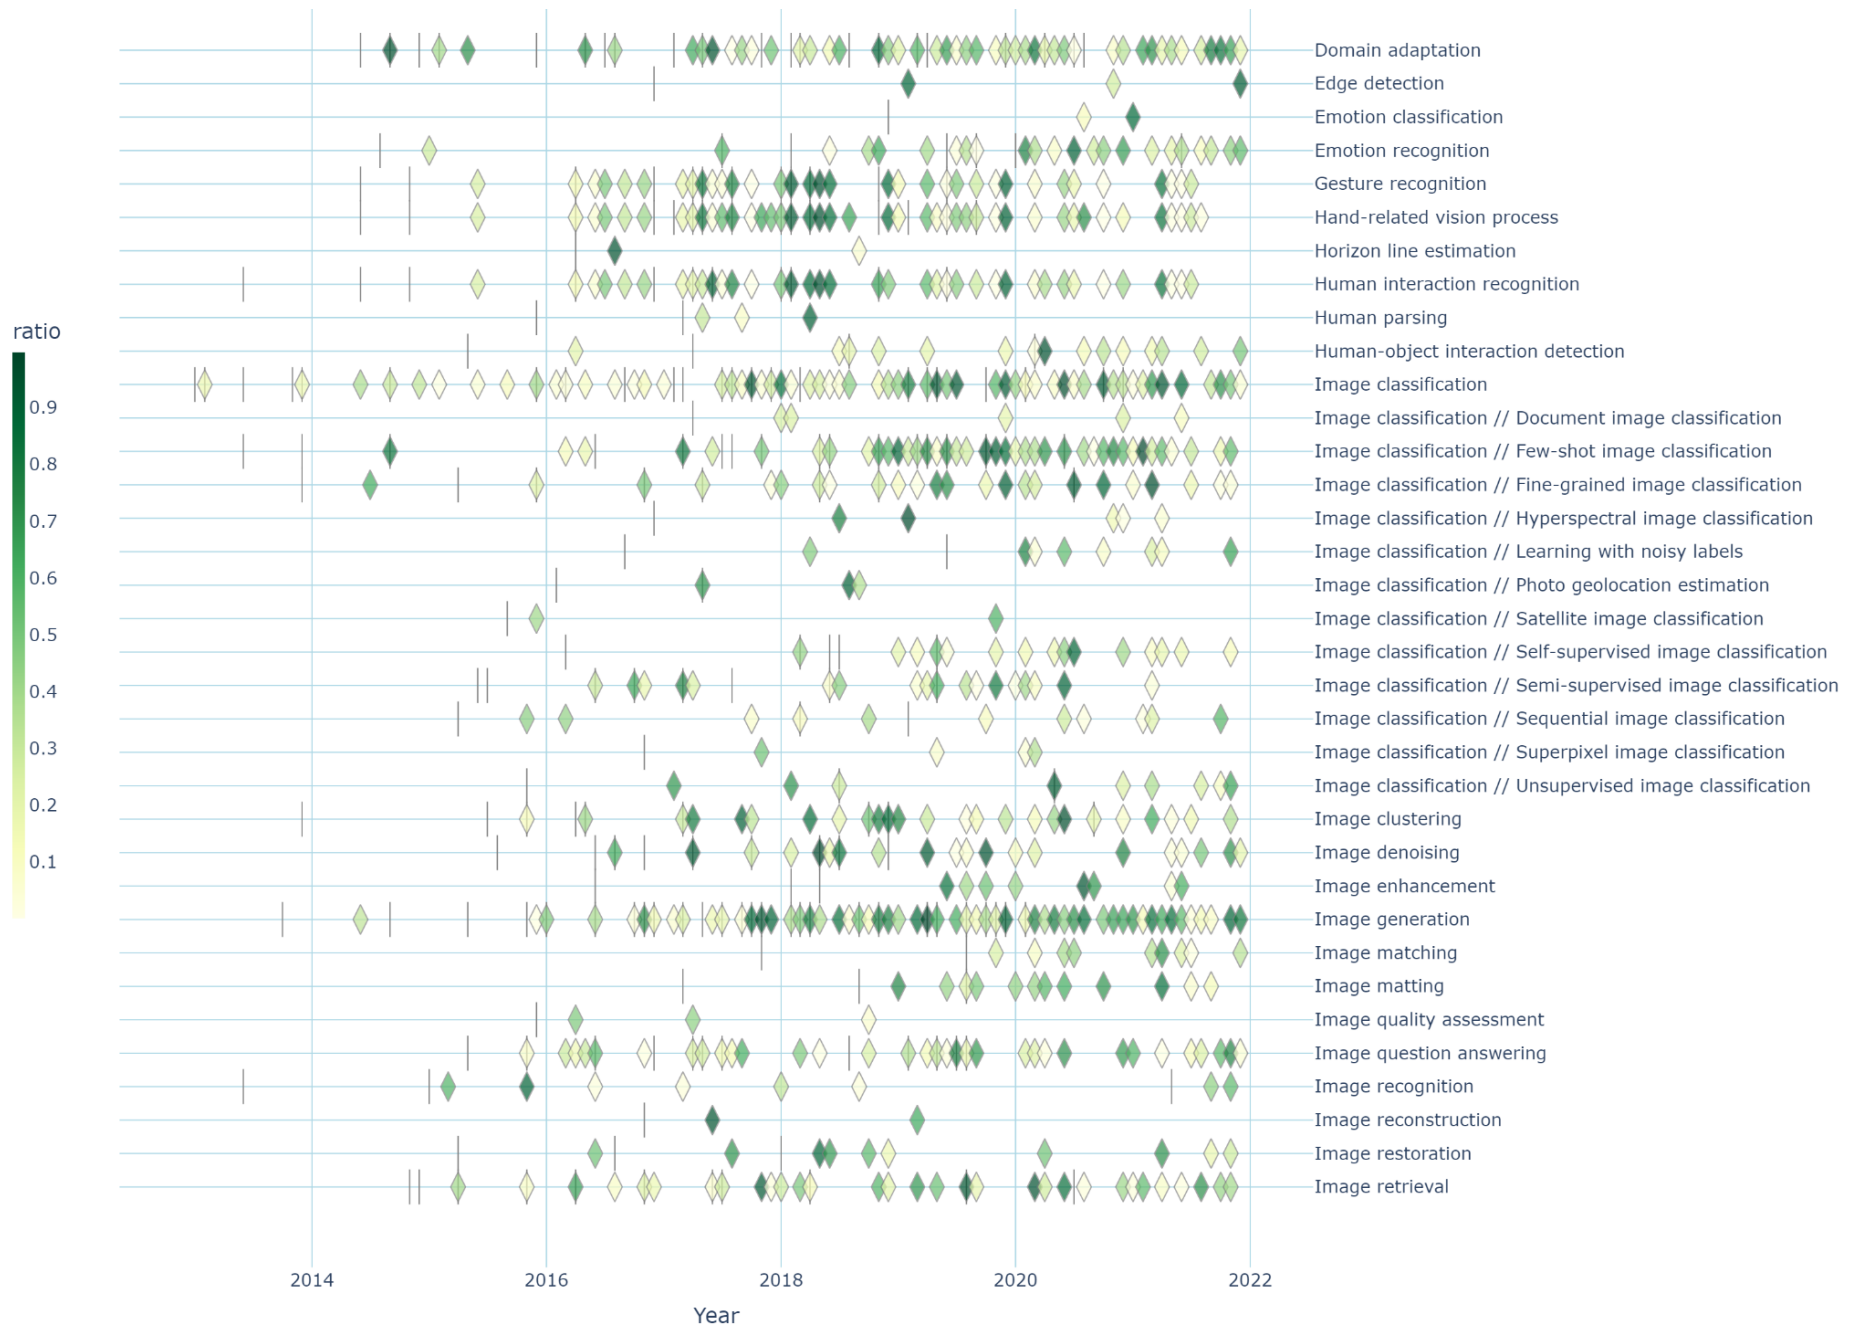

Supplementary Figure 1 (continued): **Global SOTA improvement map for computer vision.**

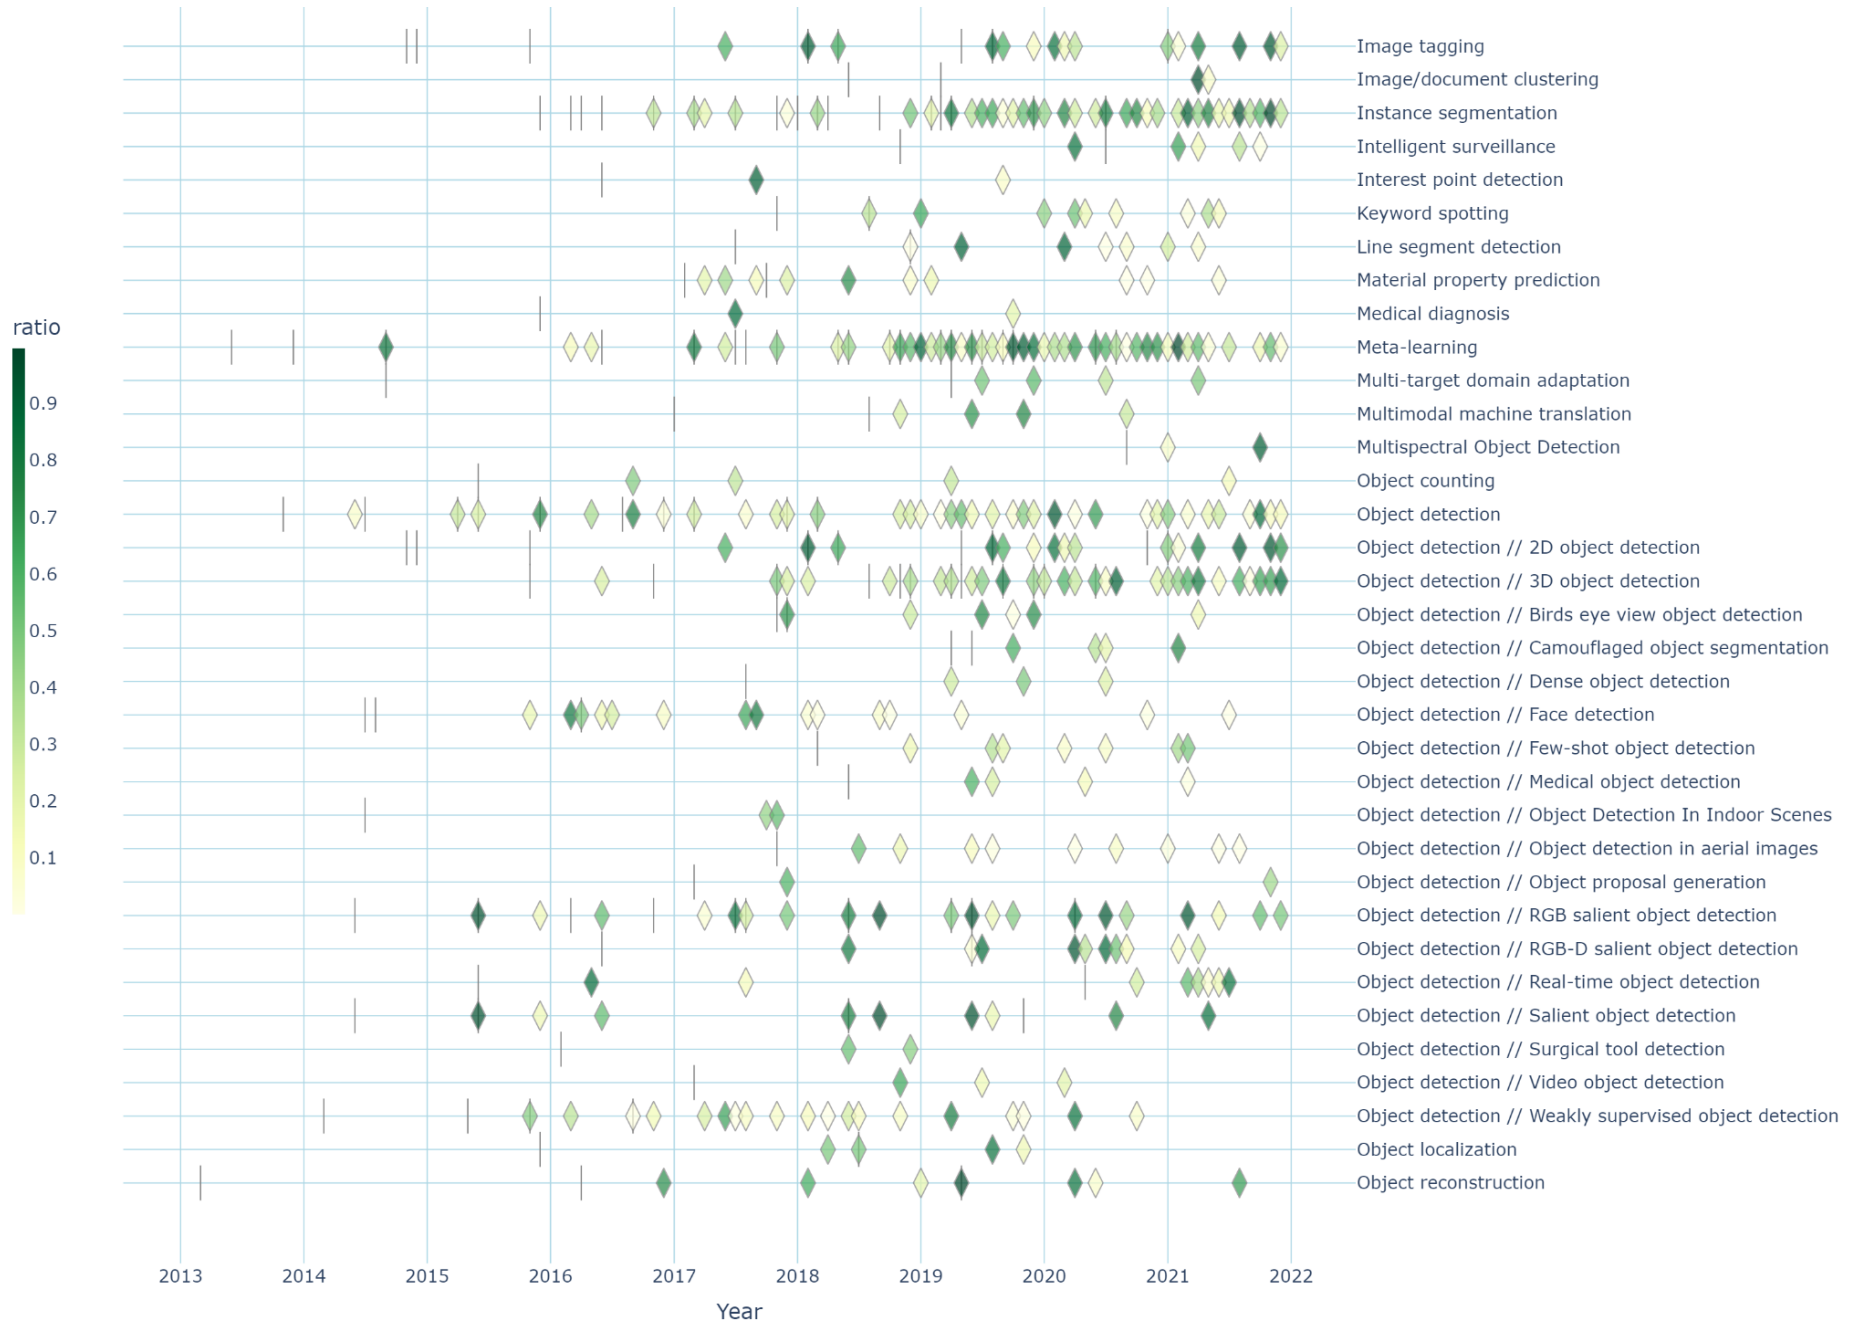

Supplementary Figure 1 (continued): **Global SOTA improvement map for computer vision.**

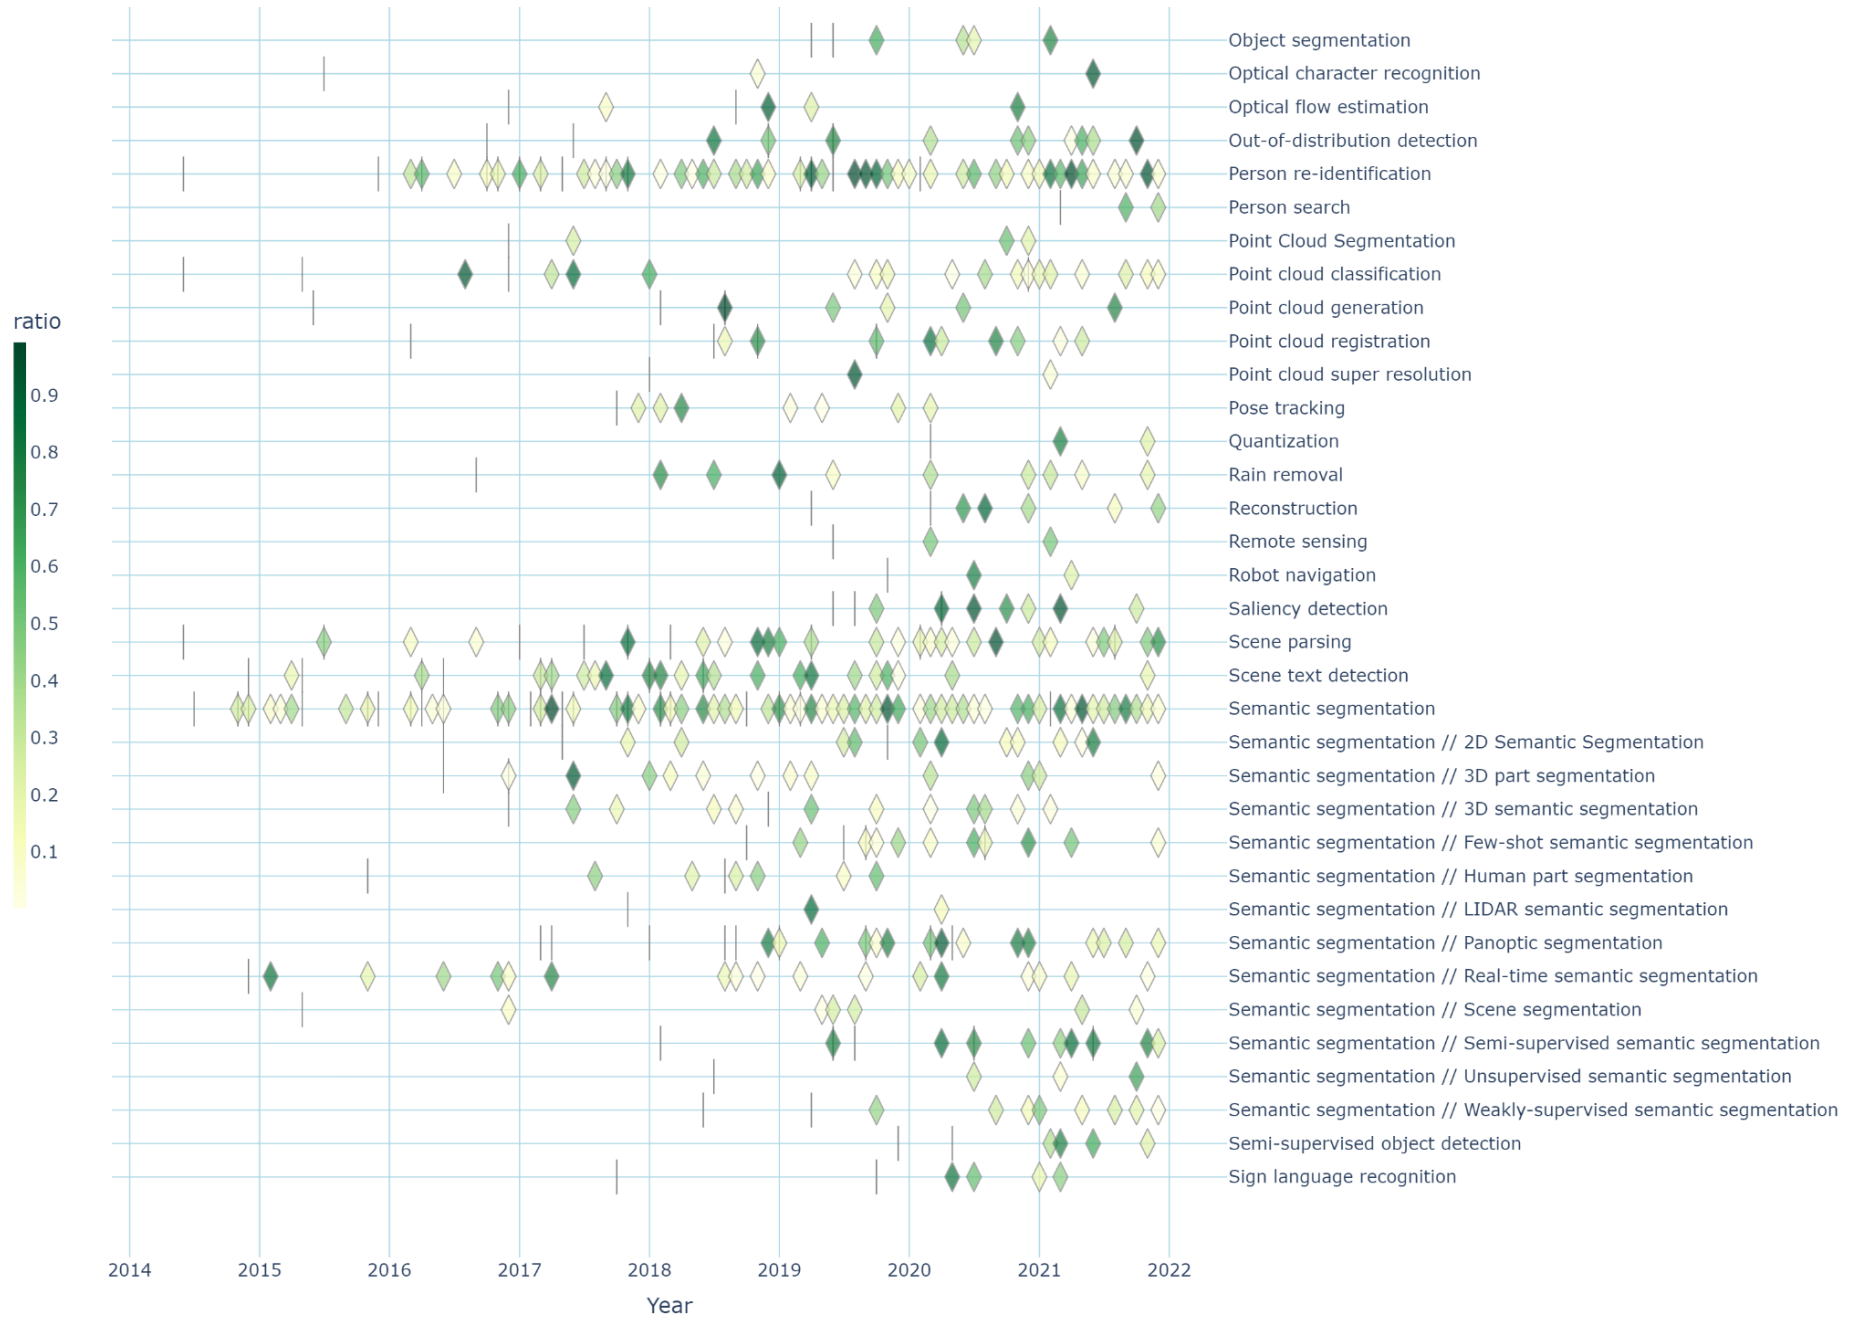

Supplementary Figure 1 (continued): **Global SOTA improvement map for computer vision.**

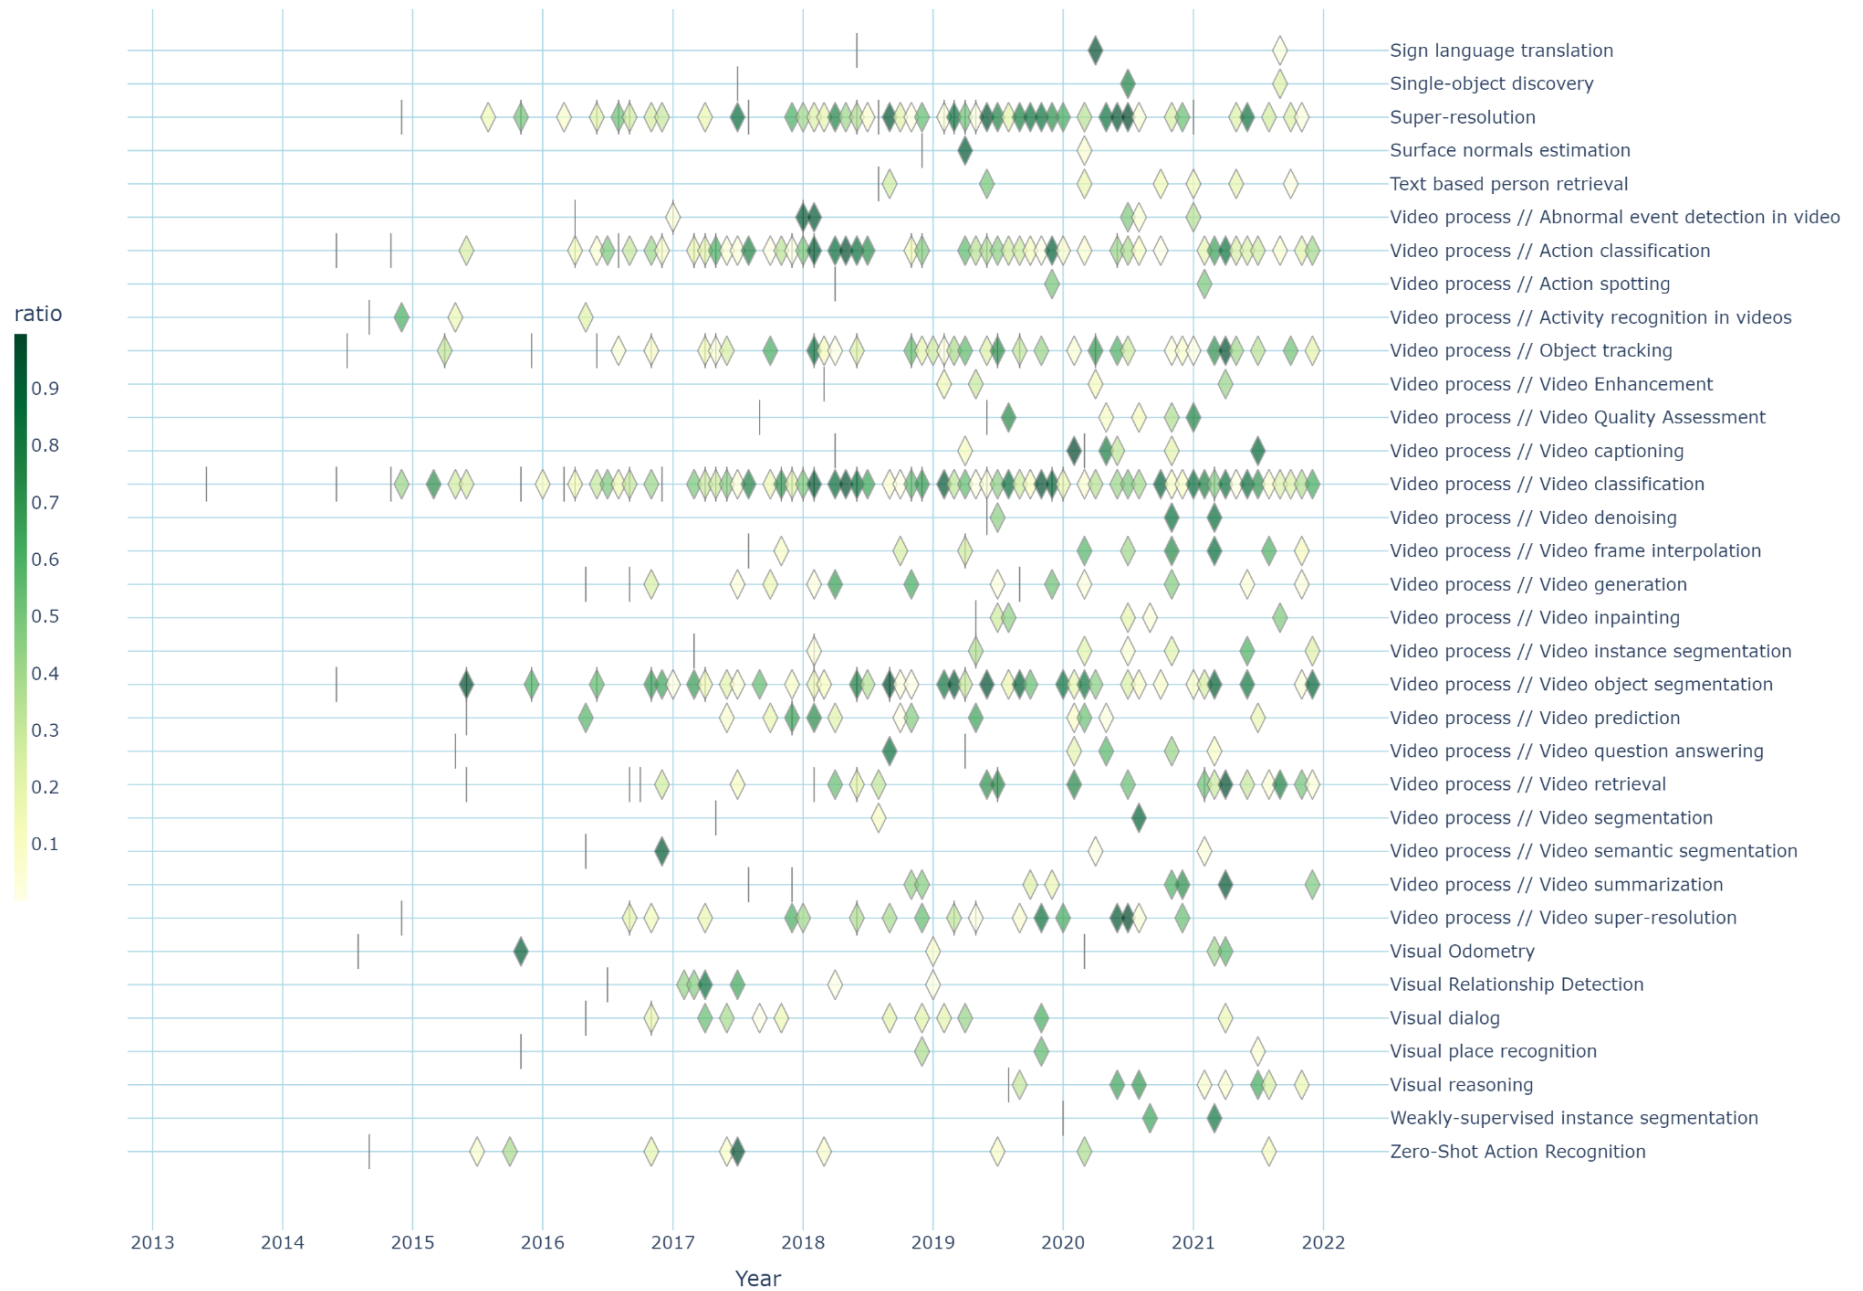

Supplementary Figure 1 (continued): **Global SOTA improvement map for computer vision.**



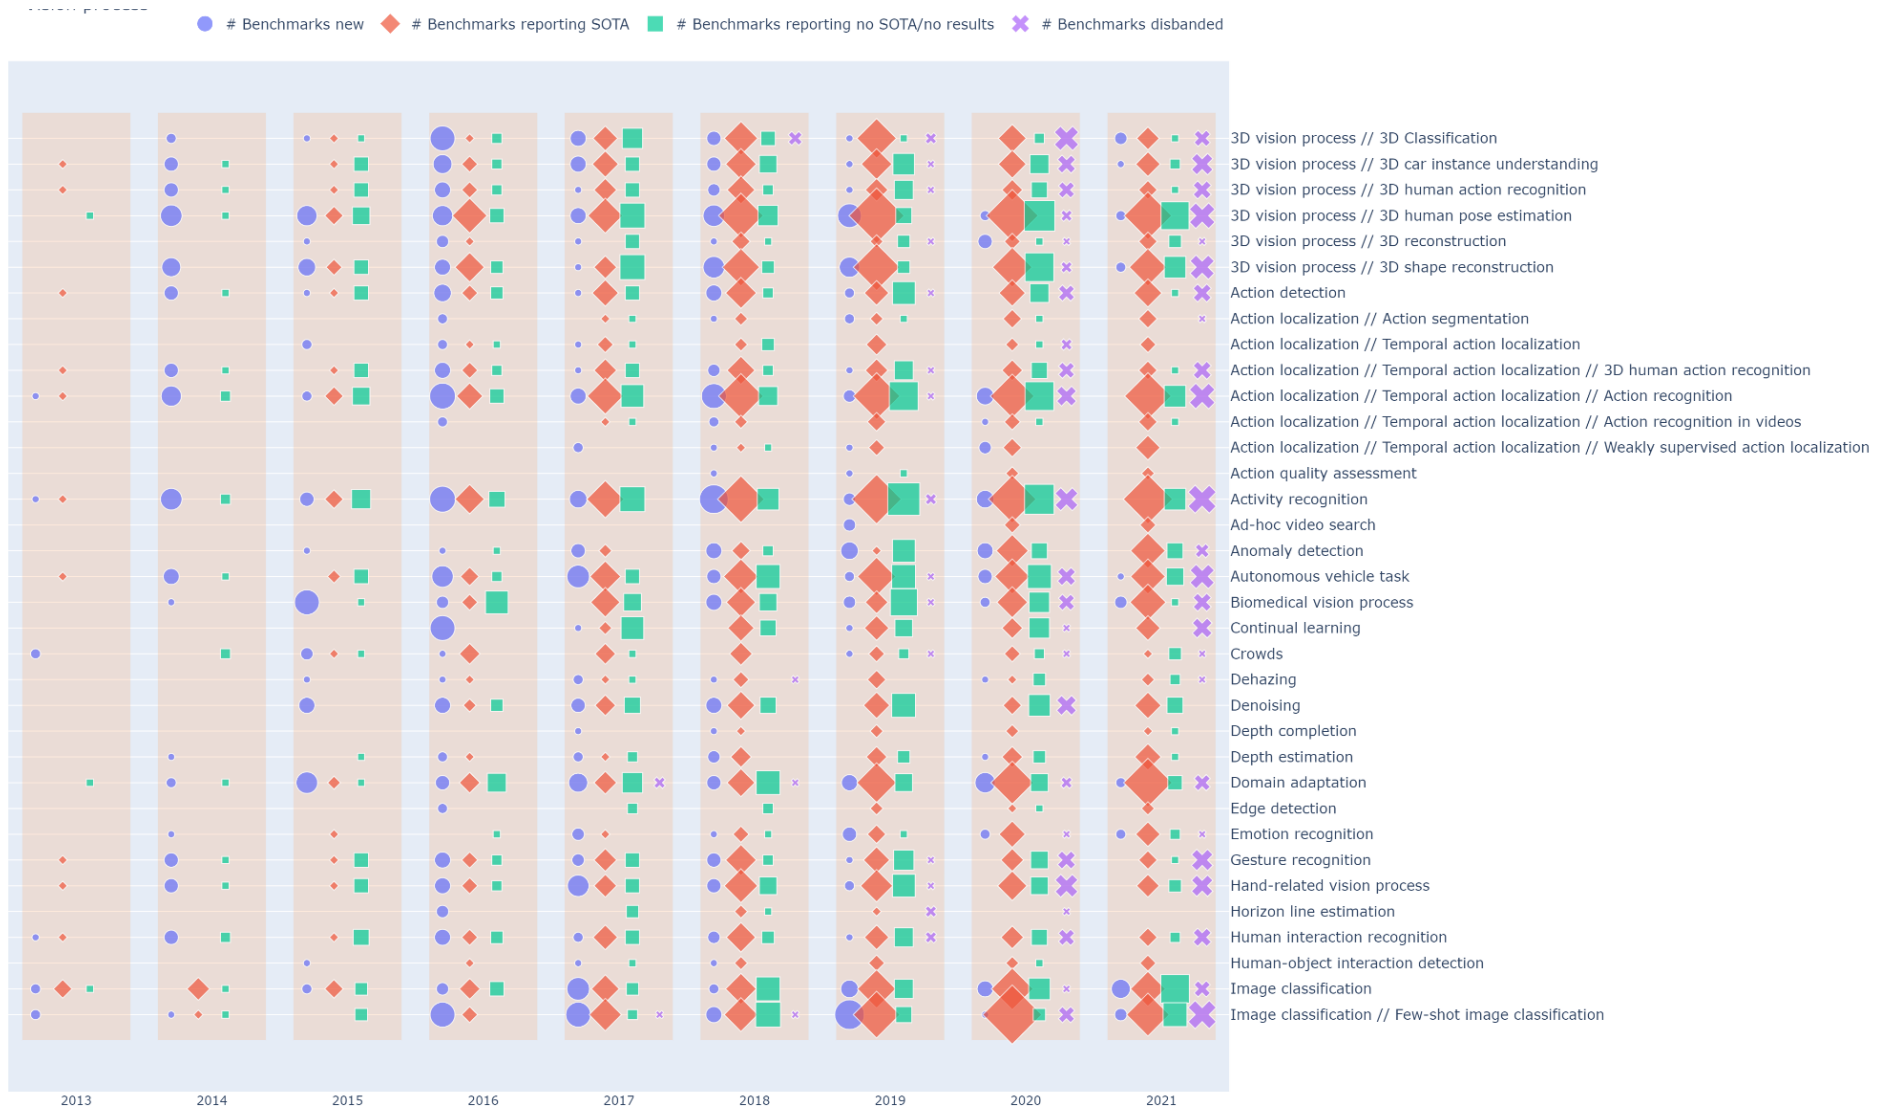

Supplementary Figure 2 (continued on following pages): **AI benchmark lifecycle map for computer vision.**

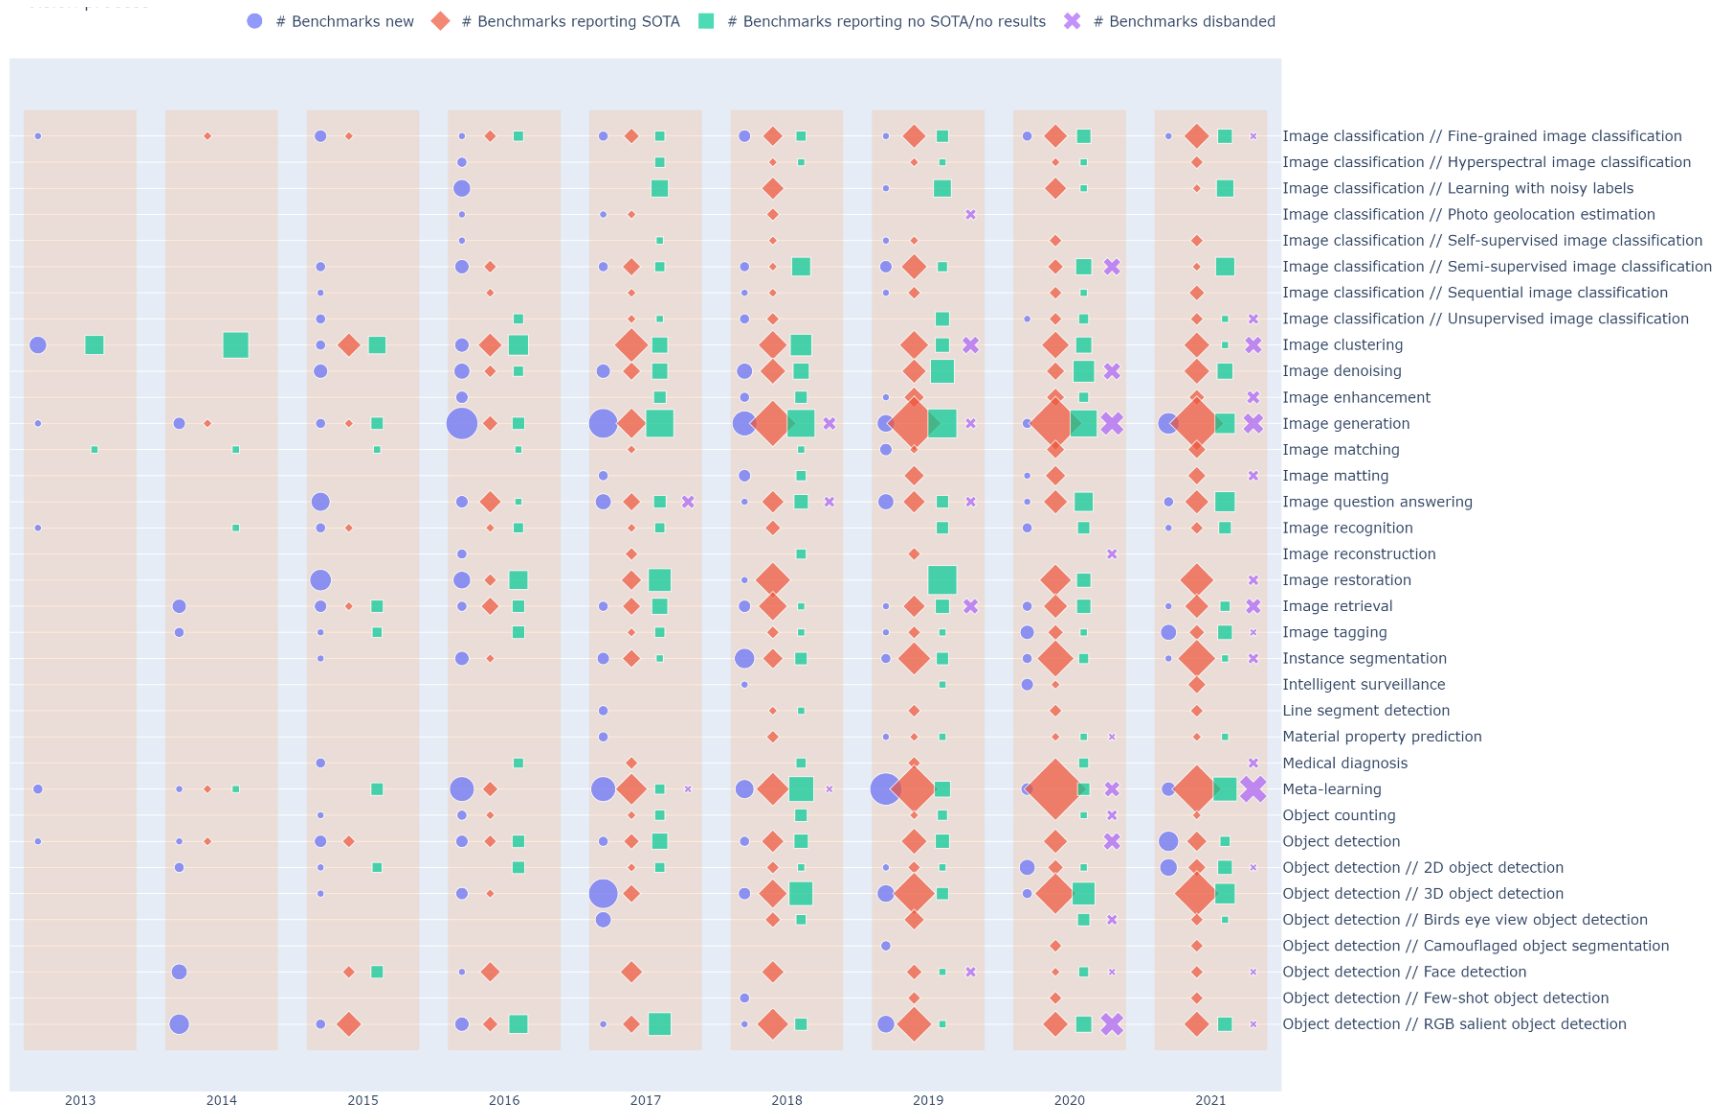

Supplementary Figure 2 (continued): AI benchmark lifecycle map for computer vision.



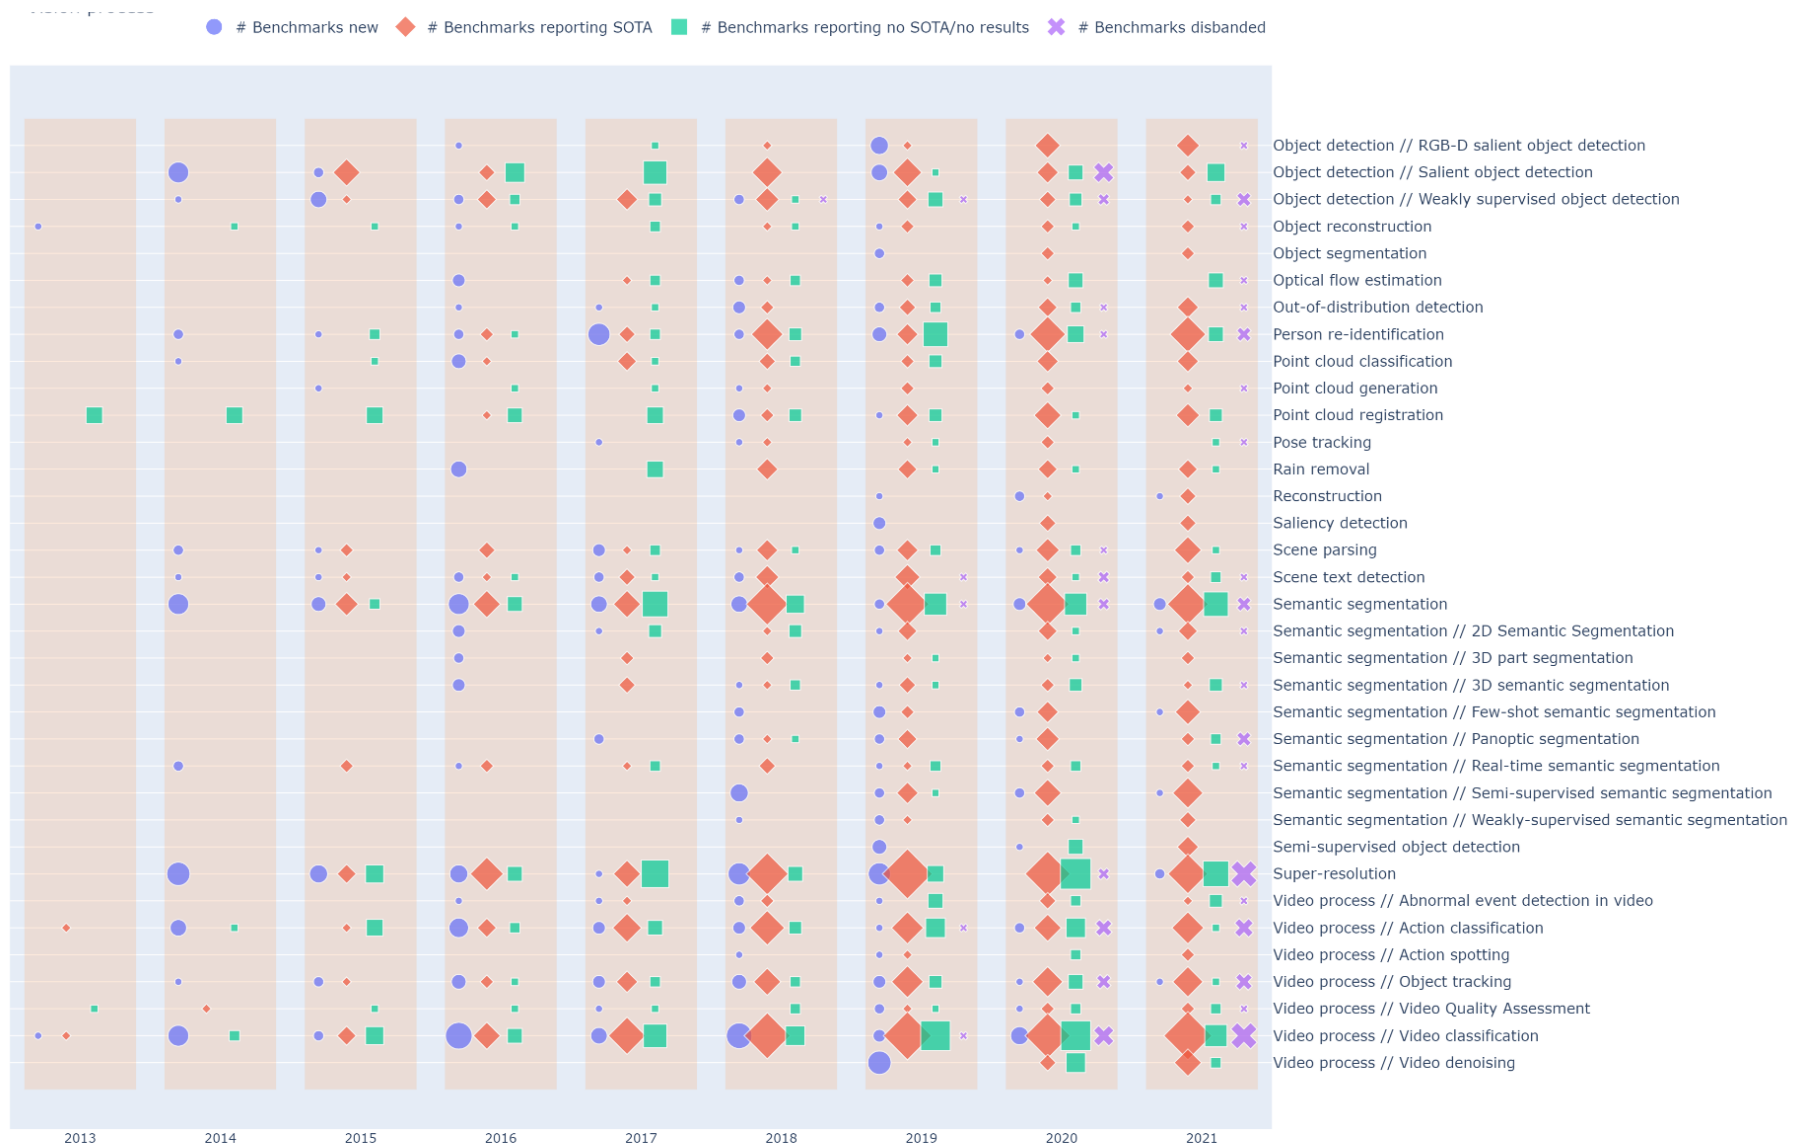

Supplementary Figure 2 (continued): AI benchmark lifecycle map for computer vision.

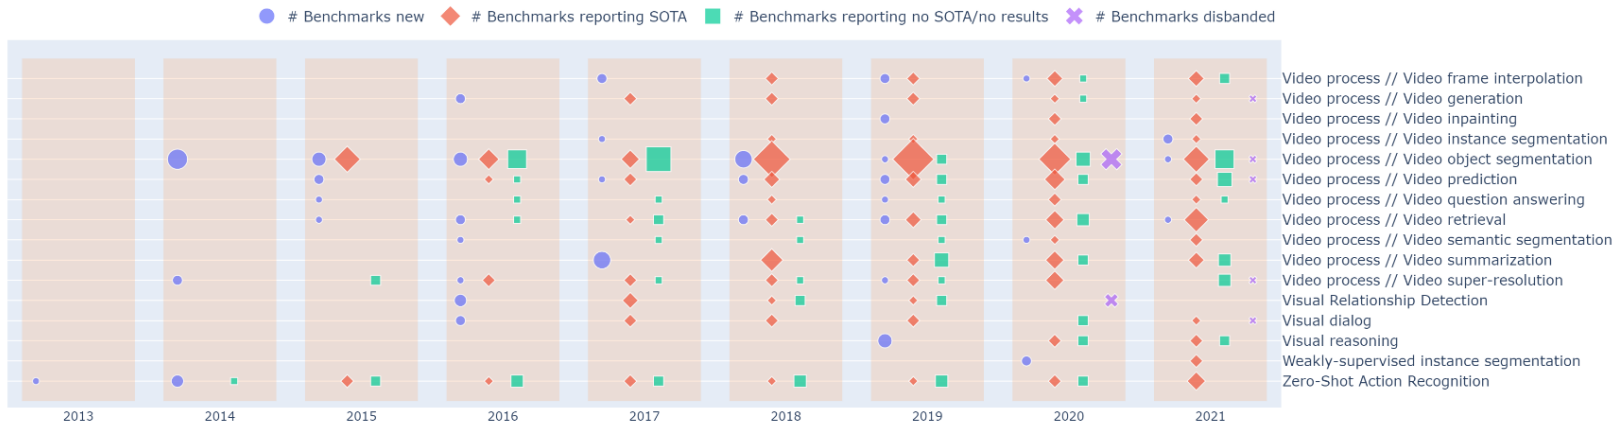

Supplementary Figure 2 (continued): **AI benchmark lifecycle map for computer vision.**

Vision process

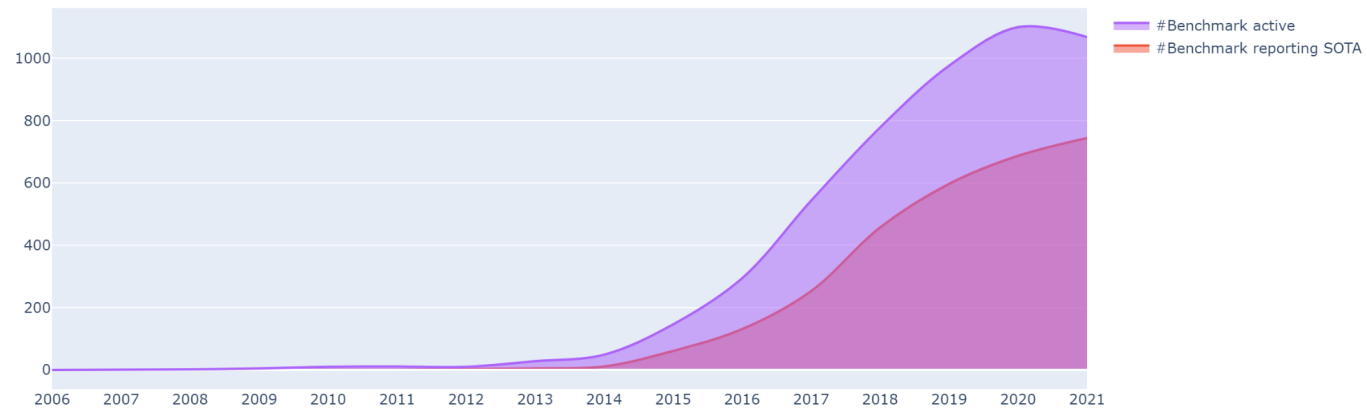

Supplementary Figure 3: **Number of active benchmarks vs. number of benchmarks reporting novel SOTA results over time for computer vision tasks.**
